# Supplementary material for: Adjusted Comparison of Outcomes between Patients from CARTITUDE-1 versus Multiple Myeloma Patients with Prior Exposure to PI, Imid and Anti-CD-38 from a German Registry
Source: MDPI journal article supplement (doi:10.3390/cancers13235996), 2021-11-29
Supplement: s1 [file s1]

# Adjusted comparison of outcomes between patients from CARTITUDE-1 versus multiple myeloma patients with prior exposure to PI, IMiD and anti-CD-38 from a German registry”

Maximilian Merz, Hartmut Goldschmidt, Parameswaran Hari, Mounzer Agha, Joris Diels, Francesca Ghilotti, Nolen J Perualila, Jedelyn Cabrieto, Benjamin Haefliger, Henrik Sliwka, Jordan M Schecter, Carolyn C Jackson, Yunsi Olyslager, Muhammad Akram, Tonia Nesheiwat, Lenka Kellermann, Sundar Jagannath

## Text S1: Additional Details, Study Methods

### Deriving R-ISS for CARTITUDE-1

R-ISS was not collected as a variable in CARTITUDE-1. It was derived based on available variables as follows:

- If ISS=1 and LDH low and no cytogenetic abnormalities/not tested, then R-ISS=1
- If ISS=3 and (LDH high or cytogenetic abnormalities), then R-ISS=3
- Else R-ISS=2

*Note* In CARTITUDE-1, LDH values were complete.

### Deriving R-ISS in TherapieMonitor Data Source

R-ISS was not directly available as a covariate within the TherapieMonitor eCRF maintained by the OncologyInformationService.

For the TherapieMonitor Cohort R-ISS was defined as follows:

- If ISS=1 and LDH low and no cytogenetic abnormalities/not tested, then R-ISS=1
- If ISS=1 and LDH missing and no cytogenetic abnormalities/not tested, then R-ISS=1
- If ISS=3 and (LDH high or cytogenetic abnormalities), then R-ISS=3
- If ISS=3 and (LDH missing and no cytogenetic abnormalities/not tested), then R-ISS=3
- Else R-ISS=2

### Handling of Multiple Lines Per Patient

Hernán et al.[25] suggest using a single eligible time (e.g., the first, the last, or a random eligible time), or all eligible times or a subset thereof following unbiased options for choosing T0. The latter strategy requires emulating multiple nested trials, each with a different start of follow-up, which can be more statistically efficient. Because individuals may be included in multiple emulated trials, appropriate adjustment of the usual variance estimator is required. Using the former strategy and choosing either the first eligible index date or the last eligible index date as T0 may lead to bias since death close to the first eligible time may be due to factors other than the care received, and death is more likely among patients receiving last LOT.

## Overview: Study Populations, Eligibility and Dates

| Population       | Description                                                                                                                                                                                                        |
|------------------|--------------------------------------------------------------------------------------------------------------------------------------------------------------------------------------------------------------------|
| CARTITUDE-1 ITT  | All enrolled patients; Index date: date of apheresis                                                                                                                                                               |
| CARTITUDE-1 mITT | All infused patients; Index date: date of infusion                                                                                                                                                                 |
| RWCP ITT         | All LOTs; Index date: date of treatment initiation of LOT                                                                                                                                                          |
| RWCP mITT        | All LOTs, excluding LOTs from patients with an event or follow-up censored within 52 days since treatment initiation (mean time from apheresis to infusion); Index date: date of treatment initiation plus 52 days |

Table S1 : Demographics Pre- and Post-Weighting

Overview of Group Demographic Balance Before and After IPW-ATT and IPW-ATO Weighting (mITT Population; All Index Dates)

| Variable                                          | Categories           | Before IPW (mITT)               |                                            |       | After IPW-ATT Weighting (mITT)  |                                           |       | After IPW-ATO Weighting (mITT)  |                                           |     |
|---------------------------------------------------|----------------------|---------------------------------|--------------------------------------------|-------|---------------------------------|-------------------------------------------|-------|---------------------------------|-------------------------------------------|-----|
|                                                   |                      | CARTITUDE<br>-1,<br>%<br>(N=97) | TherapieMonitor<br>Cohort,<br>%<br>(N=223) | SMD   | CARTITUDE<br>-1,<br>%<br>(N=97) | TherapieMonitor<br>Cohort,<br>%<br>(N=42) | SMD   | CARTITUDE<br>-1,<br>%<br>(N=13) | TherapieMonitor<br>Cohort,<br>%<br>(N=13) | SMD |
| Refractory<br>status                              | Penta refractory     | 42.3%                           | 0.4%                                       | 2.34  | 42.3%                           | 20.6%                                     | 0.71  | 6.7%                            | 6.7%                                      | 0   |
|                                                   | Quad refractory      | 37.1%                           | 6.7%                                       |       | 37.1%                           | 31.9%                                     |       | 26.7%                           | 26.7%                                     |     |
|                                                   | Triple refractory    | 3.2%                            | 11.7%                                      |       | 8.2%                            | 9.5%                                      |       | 20.6%                           | 20.6%                                     |     |
|                                                   | <= Double refractory | 12.4%                           | 81.2%                                      |       | 12.4%                           | 37.9%                                     |       | 46.0%                           | 46.0%                                     |     |
| R-ISS<br>stage                                    | I                    | 34.0%                           | 1.3%                                       | 1.50  | 34.0%                           | 20.7%                                     | 0.54  | 15.4%                           | 15.4%                                     | 0   |
|                                                   | II                   | 58.8%                           | 42.6%                                      |       | 58.8%                           | 54.0%                                     |       | 65.8%                           | 65.8%                                     |     |
|                                                   | III                  | 7.2%                            | 56.1%                                      |       | 7.2%                            | 25.3%                                     |       | 18.7%                           | 18.7%                                     |     |
| Time to<br>progress<br>on last trt<br>(months)    | < 4                  | 49.5%                           | 21.1%                                      | -0.62 | 49.5%                           | 54.2%                                     | 0.10  | 35.8%                           | 35.8%                                     | 0   |
|                                                   | 4+                   | 50.5%                           | 78.9%                                      |       | 50.5%                           | 45.8%                                     |       | 64.2%                           | 64.2%                                     |     |
| Number of<br>prior<br>LOTs                        | ≤ 4                  | 34.0%                           | 86.5%                                      | 1.27  | 34.0%                           | 35.7%                                     | 0.03  | 54.3%                           | 54.3%                                     | 0   |
|                                                   | 5+                   | 66.0%                           | 13.5%                                      |       | 66.0%                           | 64.3%                                     |       | 45.7%                           | 45.7%                                     |     |
| ECOG<br>status                                    | 0                    | 40.2%                           | 11.2%                                      | -0.70 | 40.2%                           | 10.3%                                     | -0.73 | 16.6%                           | 16.6%                                     | 0   |
|                                                   | 1                    | 59.8%                           | 88.8%                                      |       | 59.8%                           | 89.7%                                     |       | 83.4%                           | 83.4%                                     |     |
| Age<br>(years)                                    | <65                  | 63.9%                           | 14.3%                                      | 1.21  | 63.9%                           | 51.5%                                     | 0.28  | 41.9%                           | 41.9%                                     | 0   |
|                                                   | 65 to <75            | 24.7%                           | 49.8%                                      |       | 24.7%                           | 38.0%                                     |       | 39.5%                           | 39.5%                                     |     |
|                                                   | 75+                  | 11.3%                           | 35.9%                                      |       | 11.3%                           | 10.5%                                     |       | 18.5%                           | 18.5%                                     |     |
| Sex                                               | Male                 | 58.8%                           | 61.9%                                      | 0.06  | 58.8%                           | 47.9%                                     | -0.22 | 56.3%                           | 56.3%                                     | 0   |
|                                                   | Female               | 41.2%                           | 38.1%                                      |       | 41.2%                           | 52.1%                                     |       | 43.7%                           | 43.7%                                     |     |
| Years<br>since<br>diagnosis                       | <6                   | 46.4%                           | 85.7%                                      | 0.91  | 46.4%                           | 41.8%                                     | -0.09 | 46.3%                           | 46.3%                                     | 0   |
|                                                   | 6 +                  | 53.6%                           | 14.3%                                      |       | 53.6%                           | 58.2%                                     |       | 53.7%                           | 53.7%                                     |     |
| Average<br>duration of<br>prior lines<br>(months) | <8.14                | 20.6%                           | 15.2%                                      | 0.36  | 20.6%                           | 22.6%                                     | 0.50  | 12.1%                           | 12.1%                                     | 0   |
|                                                   | 8.14 to <11.76       | 22.7%                           | 33.2%                                      |       | 22.7%                           | 7.9%                                      |       | 15.2%                           | 15.2%                                     |     |
|                                                   | 11.76 to <17.61      | 27.8%                           | 34.5%                                      |       | 27.8%                           | 24.2%                                     |       | 30.7%                           | 30.7%                                     |     |
|                                                   | >17.61 months        | 28.9%                           | 17%                                        |       | 28.9%                           | 45.3%                                     |       | 42.0%                           | 42.0%                                     |     |
| Summary Diagnostics                               |                      |                                 |                                            |       |                                 |                                           |       |                                 |                                           |     |
| Mean SMD                                          |                      | 1.00                            |                                            |       | 0.36                            |                                           |       | 0                               |                                           |     |
| % SMDs > 0.2                                      |                      | 8/9 = 88.9%                     |                                            |       | 6/9 = 66.6%                     |                                           |       | 0/9 = 0%                        |                                           |     |

Note R-ISS is derived for both CARTITUDE-1 and TherapieMonitor

Abbreviations: SMD, standardized mean difference; IPW, inverse probability weighting; ATT: average treatment effect on the treated; ATO: overlap weighting

**Table S2: Treatment Regimens, External Control Group**

A total of 33 unique treatment regimens were received by patients from the German external control group represented by the TherapieMonitor cohort. Details of the frequency of each regimen are provided below.

| Treatment Regimen                                                                    | Number of Lines of Treatment |
|--------------------------------------------------------------------------------------|------------------------------|
| IxaRd (ixazomib, lenalidomide, dexamethasone)                                        | 55 (17.6%)                   |
| Pd (pomalidomide, dexamethasone)                                                     | 47 (15.1%)                   |
| MP (melphalan, prednisone)                                                           | 33 (10.6%)                   |
| EloRd (elotuzumab, lenalidomide, dexamethasone)                                      | 23 (7.4%)                    |
| Daratumumab                                                                          | 22 (7.1%)                    |
| Vd (bortezomib, dexamethasone)                                                       | 22 (7.1%)                    |
| TP (thalidomide, prednisone)                                                         | 13 (4.2%)                    |
| Kd (carfilzomib, dexamethasone)                                                      | 13 (4.2%)                    |
| PanoVd (panobinostat, bortezomib, dexamethasone)                                     | 13 (4.2%)                    |
| DVd (daratumumab, bortezomib, dexamethasone)                                         | 11 (3.5%)                    |
| Benda-Pred (bendamustine, prednisone)                                                | 8 (2.6%)                     |
| EloPd (elotuzumab, pomalidomide, dexamethasone)                                      | 8 (2.6%)                     |
| Rd (lenalidomide, dexamethasone)                                                     | 7 (2.2%)                     |
| KRd (carfilzomib, lenalidomide, dexamethasone)                                       | 6 (1.9%)                     |
| DRd (daratumumab, lenalidomide, dexamethasone)                                       | 5 (1.6%)                     |
| PVd (pomalidomide, bortezomib, dexamethasone)                                        | 4 (1.3%)                     |
| PCd (pomalidomide, cyclophosphamide, dexamethasone)                                  | 3 (1%)                       |
| Bendamustin                                                                          | 2 (0.6%)                     |
| Elo mono (elotuzumab)                                                                | 2 (0.6%)                     |
| KCd (carfilzomib, cyclophosphamide, dexamethasone)                                   | 2 (0.6%)                     |
| Other-Dex (other treatment, dexamethasone)                                           | 1 (0.3%)                     |
| Doxorubicin                                                                          | 1 (0.3%)                     |
| Pano-Dex (panobinostat, dexamethasone)                                               | 1 (0.3%)                     |
| DPd (daratumumab, pomalidomide, dexamethasone)                                       | 1 (0.3%)                     |
| R (lenalidomide)                                                                     | 1 (0.3%)                     |
| Elo-Ixa-Len (elotuzumab, ixazomib, lenalidomide)                                     | 1 (0.3%)                     |
| DKd (daratumumab, carfilzomib, dexamethasone)                                        | 1 (0.3%)                     |
| KRP (carfilzomib, lenalidomide, pomalidomide)                                        | 1 (0.3%)                     |
| Velcade (bortezomib)                                                                 | 1 (0.3%)                     |
| VC (bortezomib, cyclophosphamide)                                                    | 1 (0.3%)                     |
| DPVd + adriamycin (daratumumab, pomalidomide, bortezomib, dexamethasone, adriamycin) | 1 (0.3%)                     |
| VRCd (bortezomib, lenalidomide, cyclophosphamide, dexamethasone)                     | 1 (0.3%)                     |
| VTd (bortezomib, thalidomide, dexamethasone)                                         | 1 (0.3%)                     |

**Text S2: Definitions of Refractory Disease**

With regard to disease status, the following definitions were employed for types of refractory disease in the analyses presented:

- **Tri-refractory:** Refractory to an immunomodulatory drug (IMiD; either lenalidomide, pomalidomide, thalidomide), a proteasome inhibitor (PI; either bortezomib, carfilzomib, ixazomib) and an anti-CD38 MoAb (either daratumumab, isatuximab)
- **Quadruple refractory:** Refractory to either two IMiDs, one PI and at least one anti-CD38 mAb OR one IMiD, two PIs and at least one anti-CD38 MoAb
- **Penta-refractory:** Refractory to two IMiDs, two PIs and at least one anti-CD38 MoAb.

Figure S1: Covariate Effects from Cox Regression, TTNT, mITT cohorts

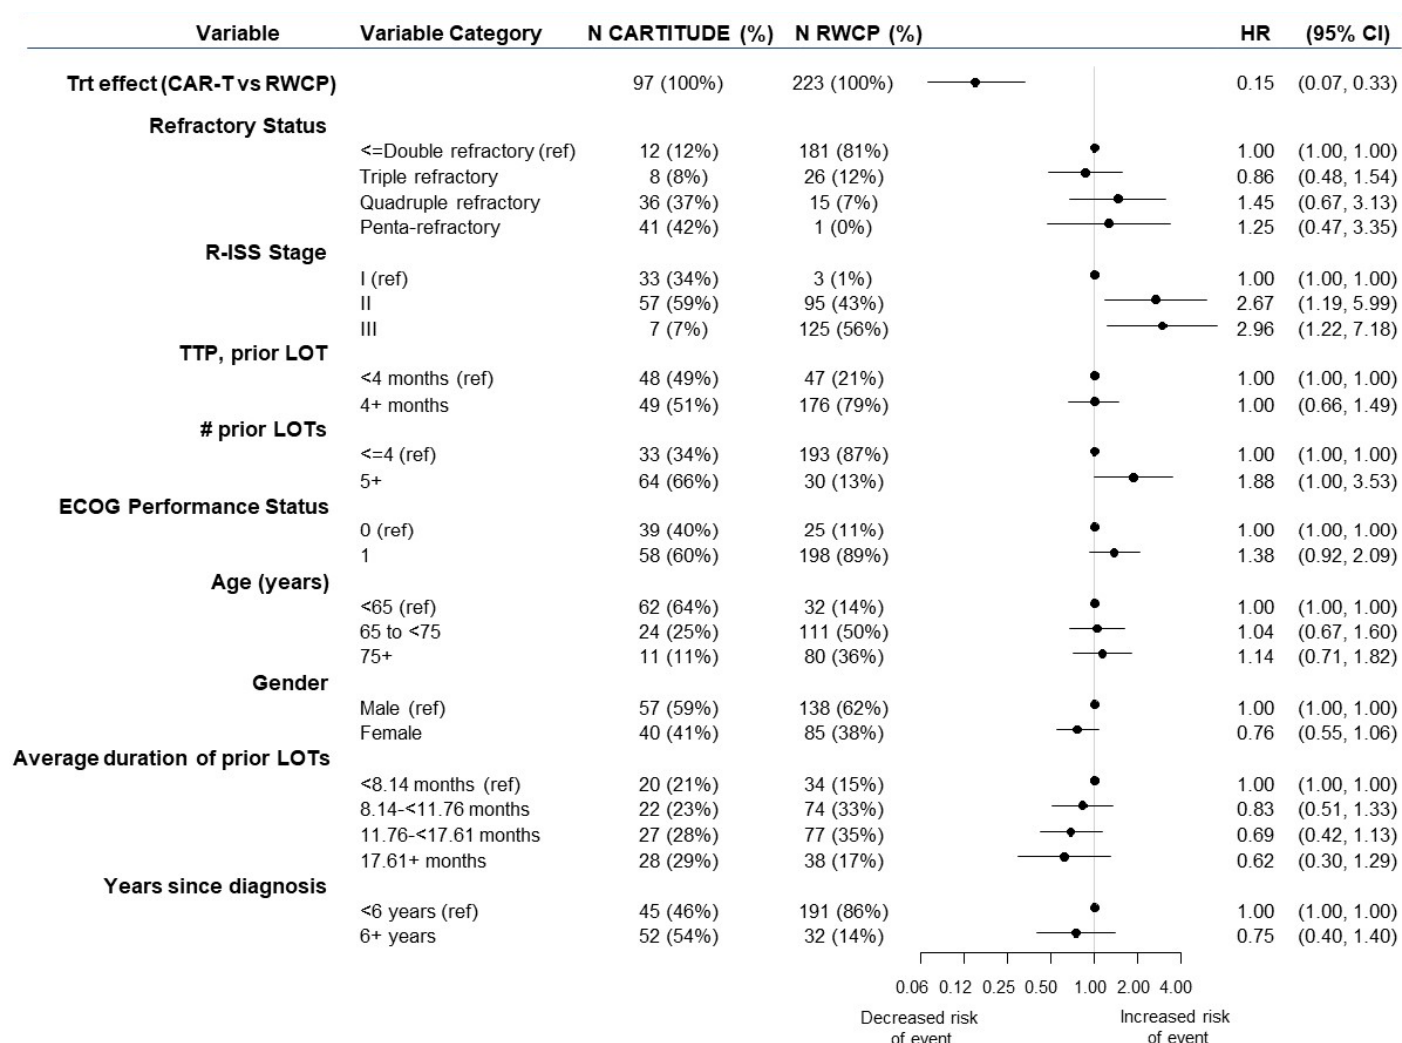

**Time to Next Treatment, mITT comparison, Covariate Effects from Cox PH Multivariable Regression Analysis.** The clinical effects associated with the modeled covariates in a multivariable Cox proportional hazards regression model for TTNT are presented based upon data from the mITT population. R-ISS stage was derived for both cohorts based on individual components. Abbreviations: CI, confidence interval; LOT, line of therapy; HR, hazard ratio; R-ISS, Revised International Staging System; RWCP, real-world clinical practice.

Figure S2: Propensity Score Distributions

Propensity score distributions for (a) observed, (b) ATT weighted and (c) ATO weighted, ITT population  
Prior to IPW Weighting  
(Naïve Comparison)

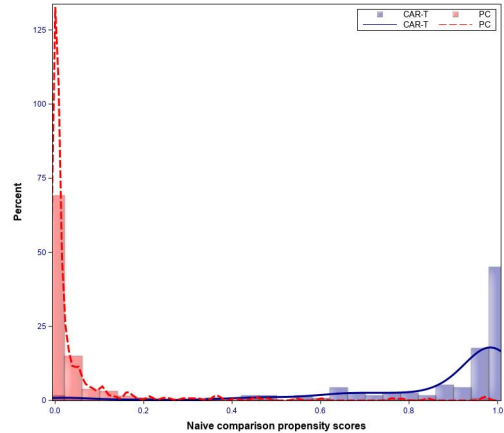

(a)

IPW-ATT Weighting

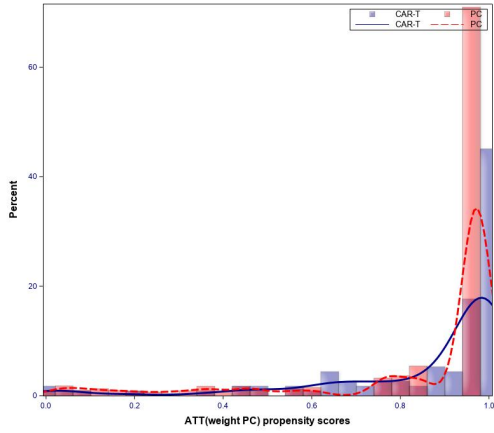

(b)

IPW-ATO Weighting

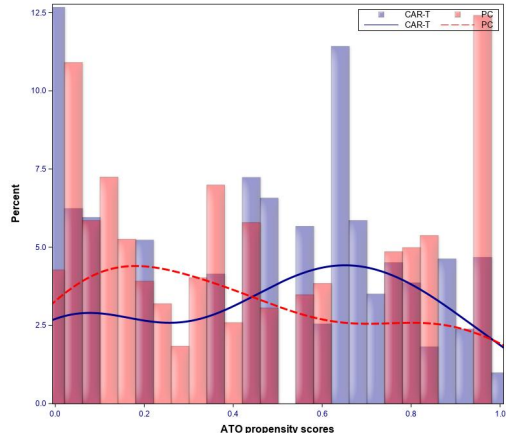

(c)

Note Y-axis scales differ between graphs

Propensity score distributions for (a) observed, (b) ATT weighted and (c) ATO weighted, mITT population

Prior to IPW Weighting  
(Naïve Comparison)

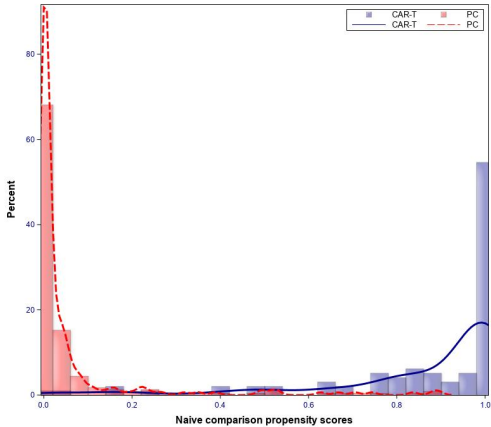

(a)

IPW-ATT Weighting

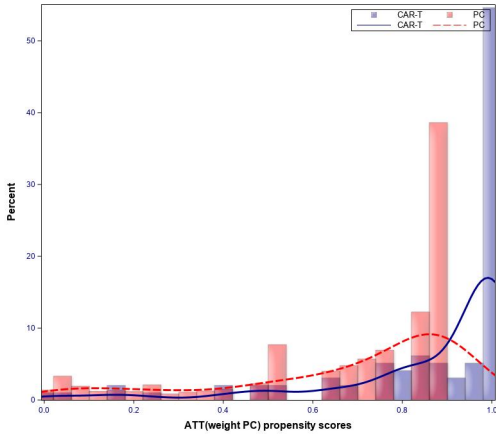

(b)

IPW-ATO Weighting

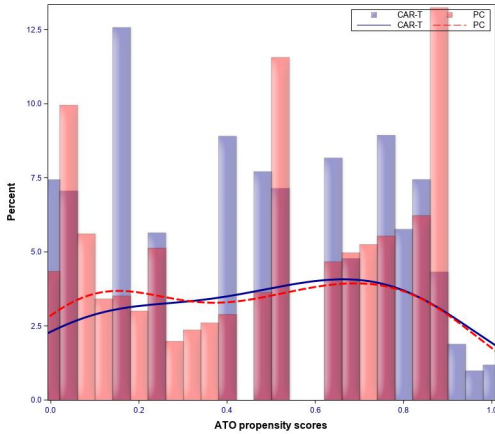

(c)

Note Y-axis scales differ between graphs
